# Supplementary material for: Cross-Sectional and Longitudinal Examination of Insulin Sensitivity and Secretion across Puberty among Non-Hispanic Black and White Children
Source: PubMed Central journal article supplement — Endocrinol Metab (Seoul). 2020 Nov 18;35(4):847–57. doi: 10.3803/EnM.2020.771 (PMC7803592; doi:10.3803/enm.2020.771), 2020-11-18
Supplement: enm-2020-771-suppl.pdf [file enm-2020-771-suppl.pdf]

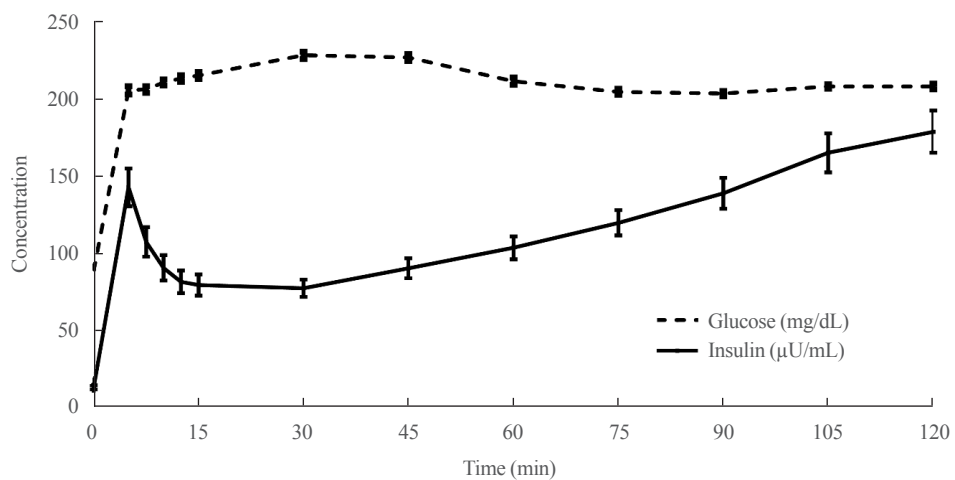

**Supplemental Fig. S1.** Glucose and insulin profiles for all hyperglycemic clamp studies that were included in the cross-sectional analyses.
